# Supplementary material for: Forward selection in a maritime pine polycross progeny trial using pedigree reconstruction
Source: Springer Nature journal article supplement (doi:10.1007/s13595-016-0596-8), 2017-02-21
Supplement: MOESM1 [file 13595_2016_596_MOESM1_ESM.pdf]

**Supplemental table: summary of breeding strategies**

Estimation of expected genetic gains for girth (GBH), height (HT) and stem sweep (SWE) in virtual clonal seed orchards (CSO) established from different breeding strategies: forward selections (from preselection strategies S1 or S2) with either no restriction on Ns (top12), or Ns=10 or Ns=20; backward selection with constraint on Ns (10 or 20); mixed selections with constraint on Ns (10 or 20). Optimization of selection was done with OPSEL software. The target census size of the selected population (total number of ramets constituting the CSO) was set at 600. The number of ramets available per genotype was set at 50 for G2 trees and 200 for G1 trees.

| Final selection strategy                  | Forward Top12 G2 |            | Forward with restriction on Ns |           |            |             | Backward with restriction on Ns |             | Mixed (FOR_BACK) with restriction on Ns |                     |                      |                      |
|-------------------------------------------|------------------|------------|--------------------------------|-----------|------------|-------------|---------------------------------|-------------|-----------------------------------------|---------------------|----------------------|----------------------|
|                                           | No restriction   |            | Ns=10                          |           | Ns=20      |             | Ns=10                           | Ns=20       | Ns=10                                   |                     | Ns=20                |                      |
| Restriction on status number (Ns)         | P51              | P52        | P51                            | P52       | P51        | P52         |                                 |             | P51                                     | P52                 | P51                  | P52                  |
| Preselection option                       | 12 best G2       | 12 best G2 | 122 G2                         | 125 G2    | 122 G2     | 125 G2      | 166 G1                          | 166 G1      | 122 G2 + 166 G1                         | 125 G2 + 166 G1     | 122 G2 + 166 G1      | 125 G2 + 166 G1      |
| Number of genotypes available             | 12               | 12         | 37                             | 20        | 77         | 57          | 23                              | 43          | 37 (31 G2 and 6 G1)                     | 26 (19 G2 and 7 G1) | 77 (58 G2 and 19 G1) | 63 (51 G2 and 12 G1) |
| Number of ramets/genotype (mean(min-max)) | 50 (50-50)       | 50 (50-50) | 16.2 (2-49)                    | 30 (2-50) | 7.8 (1-22) | 10.6 (1-31) | 26.1 (1-113)                    | 13.9 (1-55) | 16.3 (1-107)                            | 23.1 (1-114)        | 7.8 (1-39)           | 9.6 (1-47)           |
| Average index of the CSO                  | 3.3              | 3.2        | 3.1                            | 3.1       | 2.8        | 2.8         | 3.0                             | 2.6         | 3.2                                     | 3.2                 | 2.9                  | 2.9                  |
| Genetic gain for GBH at age 12 (in %)     | 15.8             | 16.3       | 15.1                           | 15.1      | 13.3       | 13.3        | 14.6                            | 12.2        | 15.4                                    | 15.7                | 13.5                 | 13.7                 |
| Genetic gain for HT at age 12 (in %)      | 15.8             | 15.9       | 14.8                           | 15.1      | 13.1       | 13.1        | 13.6                            | 11.6        | 15.0                                    | 15.2                | 13.2                 | 13.2                 |
| Genetic gain for SWE at age 8 (in %)      | 31.8             | 29.2       | 30.6                           | 29.5      | 28.5       | 27.4        | 29.2                            | 26.4        | 32.0                                    | 31.6                | 29.2                 | 28.8                 |
